# Supplementary material
Source: PubMed Central journal article supplement (PMC4702259)
Supplement: NIHMS748491-supplement-Supplemental_Figures_S1___S2.pdf [file NIHMS748491-supplement-Supplemental_Figures_S1___S2.pdf]

## Supplemental Figure S1

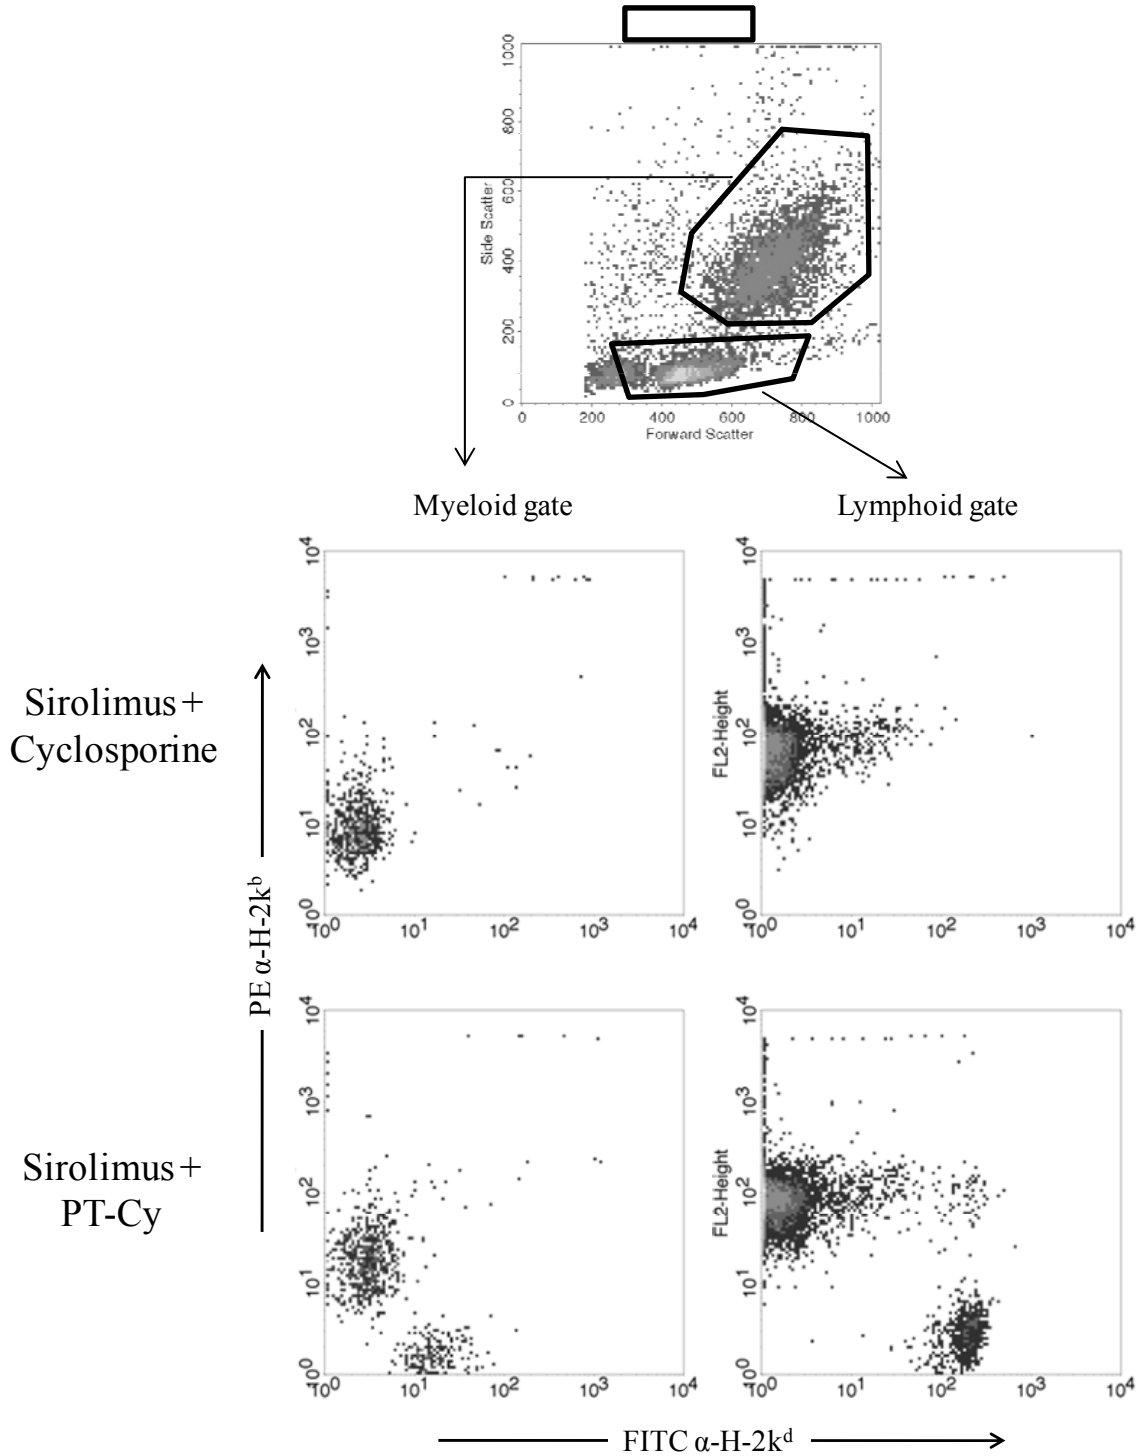

**Figure S1.** Flow cytometry to evaluate donor chimerism levels. Flow cytometry results from two representative mice performed at 16 weeks post-transplant. After red blood cell lysis, peripheral blood obtained from recipient mice was stained with a FITC-conjugated monoclonal antibody to the K<sup>d</sup> antigen (donor) and a PE-conjugated monoclonal antibody to the K<sup>b</sup> antigen (recipient). The left panels reveal myeloid gating and the right panels lymphoid gating. The upper panels are from one representative mouse that received sirolimus and cyclosporine post-transplant and subsequently rejected its graft. The bottom panels are from another mouse that was treated with sirolimus and PT-Cy post-transplant and maintained mixed chimerism. Recipient cells are located in the upper left and donor cells in the lower right.

## Supplemental Figure S2

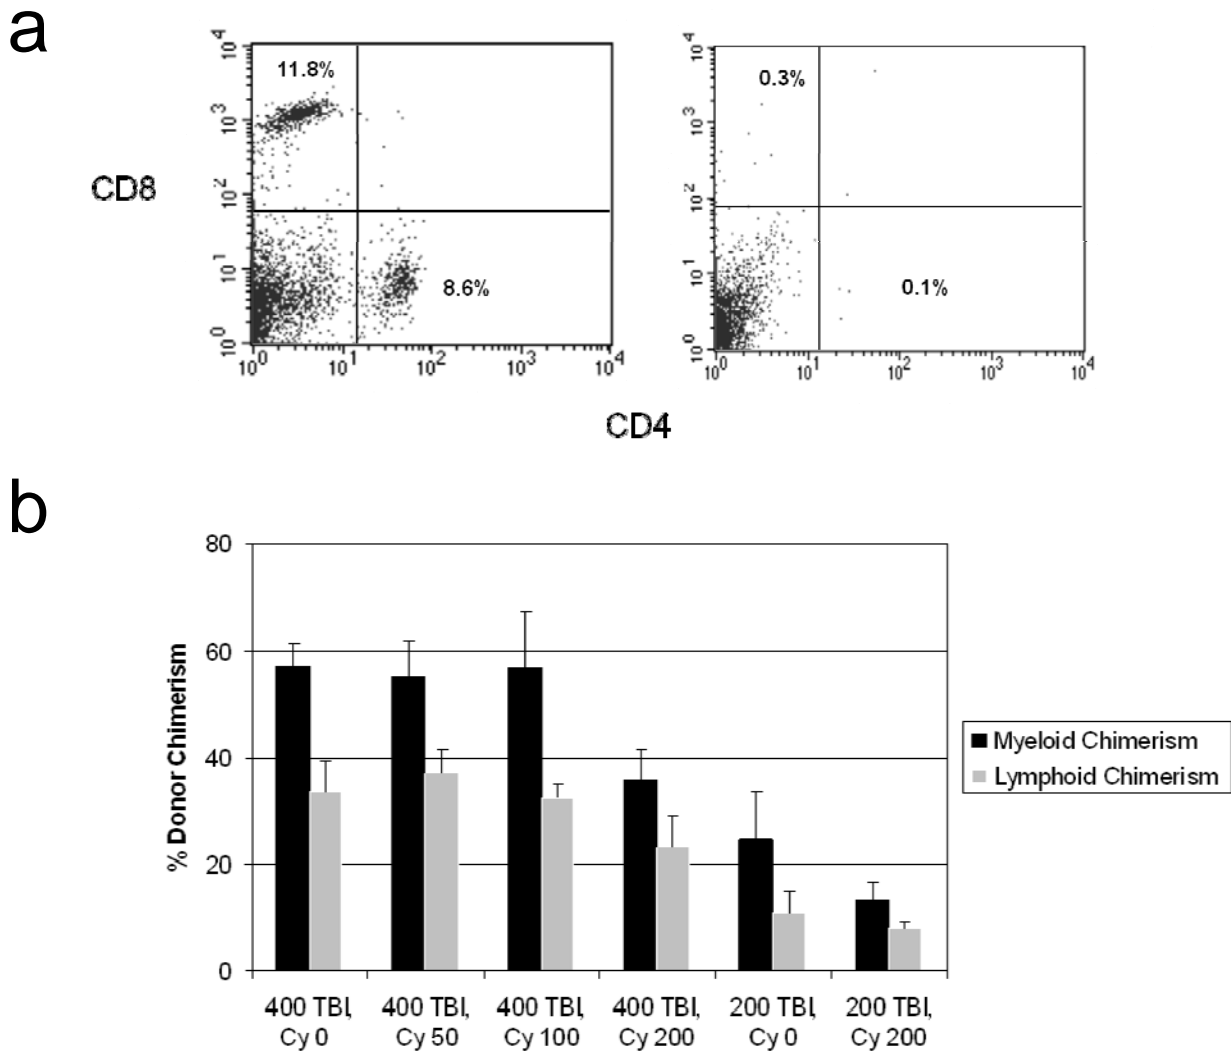

**Figure S2.** Evaluation of whether cyclophosphamide given in addition to sirolimus improves engraftment in the setting of profound lymphocyte depletion. **(a)** C57BL/6 mice (n=3) were given the lymphocyte depleting agent Thy 1.2 monoclonal antibody (mAb, 1 mg i.p.). Flow analysis was performed to evaluate the percentage of CD4<sup>+</sup> and CD8<sup>+</sup> cells in 2 littermate controls (left panel) and the treated mice (right panel). **(b)** C57BL/6 mice (n=42) received Thy 1.2 mab (1mg i.p.), sirolimus (3mg/kg/day i.p.), 200 or 400cGy TBI, 100 x 10<sup>6</sup> donor splenocytes, and cyclophosphamide (Cy) doses ranging from 0 to 200mg/kg i.p. given 2 days post transplant. These data show donor myeloid and lymphoid chimerism levels at 9 months post-transplant and represent a compilation of 2 experiments.
